# Supplementary material
Source: publisher site journal article supplement (https://www.dovepress.com/get_supplementary_file.php?f=288428.xlsx)
Supplement: Supplementary file 1 [file get_supplementary_file.php]

## Sheet: Sheet1
Table S1 Primer sequences used for qRT-PCR.
Primer	5’-3’
NAF1-qPCR-F	GCACCGACTTTGGAGTTGG
NAF1-qPCR-R	GGACCCCTCAAACGACTGT
HIF1A-qPCR-F	ATCCATGTGACCATGAGGAAATG
HIF1A-qPCR-R	TCGGCTAGTTAGGGTACACTTC
CDKN1A-qPCR-F	TGTCCGTCAGAACCCATGC
CDKN1A-qPCR-R	AAAGTCGAAGTTCCATCGCTC
BAG3-qPCR-F	TGGGAGATCAAGATCGACCC
BAG3-qPCR-R	GGGCCATTGGCAGAGGATG
CHMP4B-qPCR-F	TGCAGAGGAGATTTCAACAGC
CHMP4B-qPCR-R	TGTTTCGGGTCCACTGATTTC
ERBB2-qPCR-F	TGTGACTGCCTGTCCCTACAA
ERBB2-qPCR-R	CCAGACCATAGCACACTCGG
GAPDH-qPCR-F	GGAGCGAGATCCCTCCAAAAT
GAPDH-qPCR-R	GGCTGTTGTCATACTTCTCATGG
FAM48A-qPCR-F	GATCAGATTCCGAGACCATTCG
FAM48A-qPCR-R	GCTATGACACATCCGCAATGA
ATG16L1-qPCR-F	AACGCTGTGCAGTTCAGTCC
ATG16L1-qPCR-R	AGCTGCTAAGAGGTAAGATCCA
ITPR1-qPCR-F	ATTGCTGGGGACCGTAATCC
ITPR1-qPCR-R	TCCAATGTGACTCTCATGGCA
ACTB-qPCR-F	TGGCACCCAGCACAATGAA
ACTB-qPCR-R	CTAAGTCATAGTCCGCCTAGAAGCA
Table S2 GO enrichment analysis of 40 differentially expressed autophagy-related genes.
ONTOLOGY	ID	Description	P-value	P-adjust	geneID	Count
Biological process	GO:0006914	autophagy	2.14784e-23	2.1457e-20	HIF1A/BAG3/CHMP4B/AMBRA1/ATG4B/FOXO1/DAPK2/CLN3/RB1CC1/HGS/RAB24/NBR1/ULK2/WDR45/HDAC6/BNIP3/ZFYVE1/DAPK1/ITPR1/ATG16L1/GAPDH	21
Biological process	GO:0061919	process utilizing autophagic mechanism	2.14784e-23	2.1457e-20	HIF1A/BAG3/CHMP4B/AMBRA1/ATG4B/FOXO1/DAPK2/CLN3/RB1CC1/HGS/RAB24/NBR1/ULK2/WDR45/HDAC6/BNIP3/ZFYVE1/DAPK1/ITPR1/ATG16L1/GAPDH	21
Biological process	GO:0016236	macroautophagy	2.73311e-19	1.82025e-16	HIF1A/BAG3/CHMP4B/AMBRA1/ATG4B/CLN3/RB1CC1/HGS/NBR1/ULK2/WDR45/HDAC6/BNIP3/ZFYVE1/ATG16L1/GAPDH	16
Biological process	GO:0010506	regulation of autophagy	6.20898e-14	3.10139e-11	HIF1A/BAG3/CHMP4B/AMBRA1/FOXO1/DAPK2/RB1CC1/ULK2/HDAC6/BNIP3/DAPK1/ITPR1/GAPDH	13
Biological process	GO:0007033	vacuole organization	3.9964e-11	1.14069e-08	BAG3/CHMP4B/AMBRA1/ATG4B/CLN3/RB1CC1/ULK2/WDR45/ATG16L1	9
Biological process	GO:0000045	autophagosome assembly	1.51136e-11	6.03941e-09	BAG3/CHMP4B/AMBRA1/ATG4B/RB1CC1/ULK2/WDR45/ATG16L1	8
Biological process	GO:1905037	autophagosome organization	1.95912e-11	6.52388e-09	BAG3/CHMP4B/AMBRA1/ATG4B/RB1CC1/ULK2/WDR45/ATG16L1	8
Biological process	GO:0010508	positive regulation of autophagy	4.12581e-09	1.03042e-06	HIF1A/BAG3/AMBRA1/FOXO1/HDAC6/BNIP3/DAPK1	7
Biological process	GO:0000422	autophagy of mitochondrion	1.09129e-08	2.18039e-06	HIF1A/AMBRA1/RB1CC1/WDR45/HDAC6/BNIP3	6
Biological process	GO:0061726	mitochondrion disassembly	1.09129e-08	2.18039e-06	HIF1A/AMBRA1/RB1CC1/WDR45/HDAC6/BNIP3	6
Cellular component	GO:0005776	autophagosome	5.61513e-10	5.61513e-08	AMBRA1/DAPK2/CLN3/RAB24/NBR1/ZFYVE1/ATG16L1	7
Cellular component	GO:0045121	membrane raft	2.46482e-06	0.000100682	CFLAR/CAPN2/CLN3/IKBKB/PRKAR1A/HDAC6/ITGB1	7
Cellular component	GO:0098857	membrane microdomain	2.51705e-06	0.000100682	CFLAR/CAPN2/CLN3/IKBKB/PRKAR1A/HDAC6/ITGB1	7
Cellular component	GO:0098589	membrane region	3.21967e-06	0.000107322	CFLAR/CAPN2/CLN3/IKBKB/PRKAR1A/HDAC6/ITGB1	7
Cellular component	GO:0000407	phagophore assembly site	3.4929e-11	6.98581e-09	RB1CC1/NBR1/ULK2/WDR45/ZFYVE1/ATG16L1	6
Cellular component	GO:0005770	late endosome	0.000142422	0.00356055	CHMP4B/CLN3/HGS/NBR1/HDAC6	5
Cellular component	GO:0034045	phagophore assembly site membrane	2.33768e-08	1.55846e-06	RB1CC1/ULK2/WDR45/ATG16L1	4
Cellular component	GO:1902911	protein kinase complex	6.26172e-05	0.00178906	CDKN1A/RB1CC1/IKBKB/PRKAR1A	4
Cellular component	GO:0032838	plasma membrane bounded cell projection cytoplasm	0.0007411	0.014822	HIF1A/AMBRA1/PRKAR1A/ATG16L1	4
Cellular component	GO:1902554	serine/threonine protein kinase complex	0.000698973	0.014822	CDKN1A/RB1CC1/IKBKB	3
Molecular function	GO:0044389	ubiquitin-like protein ligase binding	4.30932e-06	0.000866174	HIF1A/CDKN1A/AMBRA1/FOXO1/HGS/PRKAR1A/HDAC6	7
Molecular function	GO:0031625	ubiquitin protein ligase binding	3.80666e-05	0.00382569	HIF1A/CDKN1A/AMBRA1/FOXO1/PRKAR1A/HDAC6	6
Molecular function	GO:0004674	protein serine/threonine kinase activity	0.000366949	0.00737567	EIF2AK3/DAPK2/IKBKB/ULK2/MAPK9/DAPK1	6
Molecular function	GO:0042826	histone deacetylase binding	0.000101797	0.00446476	HIF1A/RAC1/HDAC1/HDAC6	4
Molecular function	GO:0004197	cysteine-type endopeptidase activity	0.000120747	0.00446476	CFLAR/CAPN10/ATG4B/CAPN2	4
Molecular function	GO:0031072	heat shock protein binding	0.000133276	0.00446476	HIF1A/EIF2AK3/DNAJB1/HDAC6	4
Molecular function	GO:0019903	protein phosphatase binding	0.000248895	0.00555866	PPP1R15A/EIF2AK3/FOXO1/ERBB2	4
Molecular function	GO:0051879	Hsp90 protein binding	9.9542e-05	0.00446476	HIF1A/EIF2AK3/HDAC6	3
Molecular function	GO:0031078	histone deacetylase activity (H3-K14 specific)	0.000210592	0.00529112	HDAC1/HDAC6	2
Molecular function	GO:0032041	NAD-dependent histone deacetylase activity (H3-K14 specific)	0.000210592	0.00529112	HDAC1/HDAC6	2
Table S3 KEGG pathway enrichment analysis of 40 differentially expressed autophagy-related genes.
ID	Description	P-value	P-adjust	qvalue	geneID	Count
hsa04140	Autophagy - animal	5.54874e-17	9.21091e-15	5.31511e-15	HIF1A/CFLAR/EIF2AK3/AMBRA1/ATG4B/DAPK2/RB1CC1/ULK2/MAPK9/BNIP3/ZFYVE1/DAPK1/ITPR1/ATG16L1	14
hsa04137	Mitophagy - animal	2.71441e-07	1.90646e-05	1.10011e-05	HIF1A/EIF2AK3/AMBRA1/NBR1/MAPK9/BNIP3	6
hsa05131	Shigellosis	3.60071e-07	1.90646e-05	1.10011e-05	FOXO1/CAPN2/RAC1/IKBKB/MAPK9/BNIP3/ITGB1/ITPR1/ATG16L1	9
hsa05212	Pancreatic cancer	5.29755e-07	1.90646e-05	1.10011e-05	CDKN1A/RAC1/IKBKB/VEGFA/MAPK9/ERBB2	6
hsa05219	Bladder cancer	5.74234e-07	1.90646e-05	1.10011e-05	CDKN1A/DAPK2/VEGFA/DAPK1/ERBB2	5
hsa05167	Kaposi sarcoma-associated herpesvirus infection	9.06411e-06	0.000250774	0.000144708	HIF1A/CDKN1A/RAC1/IKBKB/VEGFA/MAPK9/ITPR1	7
hsa05010	Alzheimer disease	1.19011e-05	0.000282225	0.000162857	EIF2AK3/AMBRA1/CAPN2/RB1CC1/IKBKB/ULK2/MAPK9/ITPR1/GAPDH	9
hsa05205	Proteoglycans in cancer	1.54265e-05	0.000295147	0.000170313	HIF1A/CDKN1A/RAC1/VEGFA/ITGB1/ITPR1/ERBB2	7
hsa04210	Apoptosis	1.6002e-05	0.000295147	0.000170313	CFLAR/EIF2AK3/CAPN2/IKBKB/MAPK9/ITPR1	6
hsa04066	HIF-1 signaling pathway	7.343e-05	0.00121894	0.000703382	HIF1A/CDKN1A/VEGFA/GAPDH/ERBB2	5
